# Supplementary material
Source: publisher site journal article supplement (https://www.dovepress.com/article/389263)
Supplement: Supplementary file 1 [file get_supplementary_file.php]

**Supplementary Table 1:** Accession numbers of reference viruses used and viruses analyzed.

| Accession No GISAID                              | Isolate name                     | Subtype            | Submitting Lab                                                   |
|--------------------------------------------------|----------------------------------|--------------------|------------------------------------------------------------------|
| <b>Reference viruses</b>                         |                                  |                    |                                                                  |
| EPI_ISL_528953                                   | A/Victoria/2570/2019             | A(H1N1)pdm09       | Centers for Disease Control and Prevention                       |
| EPI_ISL_362099                                   | A/Brisbane/02/2018               | A(H1N1)pdm09       | WHO Collaborating Centre for Reference and Research on Influenza |
| EPI_ISL_151                                      | A/Hong Kong/1/1968               | A(H3N2)            | Public domain                                                    |
| EPI_ISL_1367566                                  | A/Cambodia/e0826360/2020         | A(H3N2)            | Centers for Disease Control and Prevention                       |
| EPI_ISL_292575                                   | A/Kansas/14/2017                 | A(H3N2)            | Centers for Disease Control and Prevention                       |
| EPI_ISL_288968                                   | B/Colorado/6/2017                | B-Victoria lineage | WHO Collaborating Centre for Reference and Research on Influenza |
| EPI_ISL_12709844                                 | B/Austria/1359417/2021           | B-Victoria lineage | Centers for Disease Control and Prevention                       |
| EPI_ISL_517766                                   | B/Phuket/3073/2013               | B-Yamagata lineage | Centers for Disease Control and Prevention                       |
| <b>Viruses analyzed</b>                          |                                  |                    |                                                                  |
| Robert Koch Institute, National Influenza Center |                                  |                    |                                                                  |
| <b>Accession No GISAID</b>                       | <b>Isolate name A(H1N1)pdm09</b> |                    |                                                                  |
| EPI_ISL_401777                                   | A/Hessen/71/2019                 |                    |                                                                  |
| EPI_ISL_401778                                   | A/Berlin/57/2019                 |                    |                                                                  |
| EPI_ISL_404994                                   | A/Nordrhein-Westfalen/136/2019   |                    |                                                                  |
| EPI_ISL_401779                                   | A/Niedersachsen/195/2019         |                    |                                                                  |
| EPI_ISL_401780                                   | A/Berlin/58/2019                 |                    |                                                                  |
| EPI_ISL_401781                                   | A/Berlin/59/2019                 |                    |                                                                  |
| EPI_ISL_407169                                   | A/Schleswig-Holstein/7/2019      |                    |                                                                  |
| EPI_ISL_407170                                   | A/Schleswig-Holstein/6/2019      |                    |                                                                  |
| EPI_ISL_404997                                   | A/Baden-Wuerttemberg/313/2019    |                    |                                                                  |
| EPI_ISL_404998                                   | A/Nordrhein-Westfalen/138/2019   |                    |                                                                  |
| EPI_ISL_404999                                   | A/Brandenburg/29/2019            |                    |                                                                  |

|                |                                  |
|----------------|----------------------------------|
| EPI_ISL_405000 | A/Nordrhein-Westfalen/139/2019   |
| EPI_ISL_405001 | A/Mecklenburg-Vorpommern/12/2019 |
| EPI_ISL_405002 | A/Hessen/73/2019                 |
| EPI_ISL_407171 | A/Rheinland-Pfalz/60/2019        |
| EPI_ISL_407172 | A/Rheinland-Pfalz/61/2019        |
| EPI_ISL_405004 | A/Nordrhein-Westfalen/142/2019   |
| EPI_ISL_405005 | A/Thuringen/125/2019             |
| EPI_ISL_405006 | A/Nordrhein-Westfalen/143/2019   |
| EPI_ISL_407173 | A/Nordrhein-Westfalen/1/2020     |
| EPI_ISL_407174 | A/Thuringen/1/2020               |
| EPI_ISL_407176 | A/Brandenburg/1/2020             |
| EPI_ISL_407177 | A/Saarland/1/2020                |
| EPI_ISL_407178 | A/Bremen/1/2020                  |
| EPI_ISL_407179 | A/Brandenburg/2/2020             |
| EPI_ISL_407180 | A/Rheinland-Pfalz/3/2020         |
| EPI_ISL_407182 | A/Mecklenburg-Vorpommern/1/2020  |
| EPI_ISL_407183 | A/Nordrhein-Westfalen/3/2020     |
| EPI_ISL_407186 | A/Hessen/7/2020                  |
| EPI_ISL_407187 | A/Nordrhein-Westfalen/4/2020     |
| EPI_ISL_407188 | A/Sachsen/3/2020                 |
| EPI_ISL_410054 | A/Niedersachsen/2/2020           |
| EPI_ISL_410055 | A/Niedersachsen/4/2020           |
| EPI_ISL_410056 | A/Bayern/5/2020                  |
| EPI_ISL_410057 | A/Bayern/7/2020                  |
| EPI_ISL_410059 | A/Nordrhein-Westfalen/7/2020     |
| EPI_ISL_410060 | A/Nordrhein-Westfalen/8/2020     |
| EPI_ISL_410063 | A/Nordrhein-Westfalen/9/2020     |
| EPI_ISL_410066 | A/Hessen/2/2020                  |
| EPI_ISL_410068 | A/Nordrhein-Westfalen/11/2020    |
| EPI_ISL_410071 | A/Mecklenburg-Vorpommern/2/2020  |
| EPI_ISL_410073 | A/Baden-Wuerttemberg/5/2020      |
| EPI_ISL_410950 | A/Baden-Wuerttemberg/11/2020     |
| EPI_ISL_410952 | A/Bayern/9/2020                  |
| EPI_ISL_410953 | A/Baden-Wuerttemberg/18/2020     |
| EPI_ISL_410954 | A/Baden-Wuerttemberg/19/2020     |
| EPI_ISL_410955 | A/Bayern/14/2020                 |
| EPI_ISL_410956 | A/Sachsen/10/2020                |
| EPI_ISL_410957 | A/Bayern/15/2020                 |
| EPI_ISL_410958 | A/Bayern/16/2020                 |
| EPI_ISL_410959 | A/Baden-Wuerttemberg/21/2020     |
| EPI_ISL_410960 | A/Berlin/15/2020                 |
| EPI_ISL_410961 | A/Niedersachsen/16/2020          |
| EPI_ISL_410962 | A/Hessen/18/2020                 |
| EPI_ISL_410963 | A/Baden-Wuerttemberg/22/2020     |
| EPI_ISL_410964 | A/Nordrhein-Westfalen/19/2020    |
| EPI_ISL_413419 | A/Bayern/19/2020                 |
| EPI_ISL_413420 | A/Baden-Wuerttemberg/28/2020     |
| EPI_ISL_413421 | A/Berlin/24/2020                 |
| EPI_ISL_413422 | A/Sachsen/14/2020                |
| EPI_ISL_413423 | A/Rheinland-Pfalz/12/2020        |
| EPI_ISL_413424 | A/Saarland/3/2020                |
| EPI_ISL_413425 | A/Niedersachsen/21/2020          |
| EPI_ISL_413426 | A/Baden-Wuerttemberg/47/2020     |

|                |                                 |
|----------------|---------------------------------|
| EPI_ISL_413427 | A/Baden-Wuerttemberg/109/2020   |
| EPI_ISL_413428 | A/Nordrhein-Westfalen/27/2020   |
| EPI_ISL_413429 | A/Nordrhein-Westfalen/47/2020   |
| EPI_ISL_482786 | A/Brandenburg/10/2020           |
| EPI_ISL_482787 | A/Bayern/42/2020                |
| EPI_ISL_482788 | A/Berlin/30/2020                |
| EPI_ISL_482789 | A/Saarland/4/2020               |
| EPI_ISL_482790 | A/Thuringen/14/2020             |
| EPI_ISL_482791 | A/Thuringen/13/2020             |
| EPI_ISL_482792 | A/Bremen/4/2020                 |
| EPI_ISL_645137 | A/Berlin/31/2020                |
| EPI_ISL_482793 | A/Baden-Wuerttemberg/58/2020    |
| EPI_ISL_482794 | A/Niedersachsen/49/2020         |
| EPI_ISL_482795 | A/Baden-Wuerttemberg/119/2020   |
| EPI_ISL_645138 | A/Hamburg/1/2020                |
| EPI_ISL_482796 | A/Schleswig-Holstein/4/2020     |
| EPI_ISL_482800 | A/Bayern/26/2020                |
| EPI_ISL_482802 | A/Thuringen/17/2020             |
| EPI_ISL_481381 | A/Nordrhein-Westfalen/78/2020   |
| EPI_ISL_481382 | A/Baden-Wuerttemberg/85/2020    |
| EPI_ISL_481383 | A/Saarland/5/2020               |
| EPI_ISL_481384 | A/Berlin/39/2020                |
| EPI_ISL_481385 | A/Berlin/67/2020                |
| EPI_ISL_481386 | A/Hessen/22/2020                |
| EPI_ISL_481387 | A/Saarland/6/2020               |
| EPI_ISL_481389 | A/Hessen/23/2020                |
| EPI_ISL_481390 | A/Baden-Wuerttemberg/175/2020   |
| EPI_ISL_481391 | A/Mecklenburg-Vorpommern/4/2020 |
| EPI_ISL_482847 | A/Brandenburg/8/2020            |
| EPI_ISL_481393 | A/Nordrhein-Westfalen/45/2020   |
| EPI_ISL_481394 | A/Bayern/37/2020                |
| EPI_ISL_481396 | A/Hessen/41/2020                |
| EPI_ISL_481397 | A/Nordrhein-Westfalen/46/2020   |
| EPI_ISL_481398 | A/Berlin/68/2020                |
| EPI_ISL_481399 | A/Nordrhein-Westfalen/44/2020   |
| EPI_ISL_481400 | A/Nordrhein-Westfalen/79/2020   |
| EPI_ISL_481403 | A/Berlin/43/2020                |
| EPI_ISL_481404 | A/Rheinland-Pfalz/21/2020       |
| EPI_ISL_481405 | A/Saarland/7/2020               |
| EPI_ISL_481406 | A/Niedersachsen/87/2020         |
| EPI_ISL_481407 | A/Baden-Wuerttemberg/176/2020   |
| EPI_ISL_481408 | A/Bayern/53/2020                |
| EPI_ISL_481409 | A/Bayern/55/2020                |
| EPI_ISL_481410 | A/Bayern/54/2020                |
| EPI_ISL_481411 | A/Niedersachsen/91/2020         |
| EPI_ISL_481412 | A/Hessen/42/2020                |
| EPI_ISL_481413 | A/Hessen/43/2020                |
| EPI_ISL_481414 | A/Baden-Wuerttemberg/139/2020   |
| EPI_ISL_481415 | A/Brandenburg/11/2020           |
| EPI_ISL_481417 | A/Bremen/11/2020                |
| EPI_ISL_481418 | A/Rheinland-Pfalz/31/2020       |
| EPI_ISL_481420 | A/Nordrhein-Westfalen/61/2020   |
| EPI_ISL_481421 | A/Nordrhein-Westfalen/76/2020   |

|                            |                                  |
|----------------------------|----------------------------------|
| EPI_ISL_481422             | A/Saarland/9/2020                |
| EPI_ISL_481424             | A/Bayern/49/2020                 |
| EPI_ISL_481425             | A/Niedersachsen/98/2020          |
| EPI_ISL_481426             | A/Niedersachsen/137/2020         |
| EPI_ISL_481427             | A/Nordrhein-Westfalen/77/2020    |
| EPI_ISL_481428             | A/Baden-Wuerttemberg/149/2020    |
| EPI_ISL_481429             | A/Hessen/39/2020                 |
| EPI_ISL_481430             | A/Bremen/13/2020                 |
| EPI_ISL_407185             | A/Bayern/1/2020                  |
| <b>Accession No GISAID</b> | <b>Isolate name A(H3N2)</b>      |
| EPI_ISL_401783             | A/Bayern/113/2019                |
| EPI_ISL_401784             | A/Baden-Wuerttemberg/310/2019    |
| EPI_ISL_401787             | A/Mecklenburg-Vorpommern/11/2019 |
| EPI_ISL_401785             | A/Bayern/114/2019                |
| EPI_ISL_401786             | A/Baden-Wuerttemberg/312/2019    |
| EPI_ISL_405007             | A/Berlin/60/2019                 |
| EPI_ISL_407194             | A/Berlin/63/2019                 |
| EPI_ISL_405008             | A/Hessen/72/2019                 |
| EPI_ISL_405009             | A/Berlin/61/2019                 |
| EPI_ISL_405010             | A/Berlin/62/2019                 |
| EPI_ISL_405011             | A/Bayern/115/2019                |
| EPI_ISL_405013             | A/Saarland/25/2019               |
| EPI_ISL_405014             | A/Nordrhein-Westfalen/140/2019   |
| EPI_ISL_407195             | A/Berlin/1/2020                  |
| EPI_ISL_407196             | A/Thueringen/2/2020              |
| EPI_ISL_407197             | A/Thueringen/3/2020              |
| EPI_ISL_407198             | A/Nordrhein-Westfalen/5/2020     |
| EPI_ISL_407199             | A/Berlin/2/2020                  |
| EPI_ISL_407200             | A/Berlin/3/2020                  |
| EPI_ISL_407201             | A/Berlin/4/2020                  |
| EPI_ISL_407202             | A/Berlin/5/2020                  |
| EPI_ISL_407203             | A/Rheinland-Pfalz/5/2020         |
| EPI_ISL_407204             | A/Brandenburg/3/2020             |
| EPI_ISL_407205             | A/Bayern/2/2020                  |
| EPI_ISL_410076             | A/Bayern/6/2020                  |
| EPI_ISL_410078             | A/Sachsen/4/2020                 |
| EPI_ISL_410080             | A/Niedersachsen/10/2020          |
| EPI_ISL_410081             | A/Berlin/9/2020                  |
| EPI_ISL_410083             | A/Berlin/8/2020                  |
| EPI_ISL_410086             | A/Sachsen/5/2020                 |
| EPI_ISL_410091             | A/Thueringen/6/2020              |
| EPI_ISL_410965             | A/Bayern/12/2020                 |
| EPI_ISL_410966             | A/Nordrhein-Westfalen/12/2020    |
| EPI_ISL_410967             | A/Rheinland-Pfalz/9/2020         |
| EPI_ISL_410968             | A/Berlin/10/2020                 |
| EPI_ISL_410969             | A/Baden-Wuerttemberg/17/2020     |
| EPI_ISL_13503285           | A/Bayern/13/2022                 |
| EPI_ISL_410970             | A/Baden-Wuerttemberg/20/2020     |
| EPI_ISL_410971             | A/Niedersachsen/14/2020          |
| EPI_ISL_410972             | A/Hessen/6/2020                  |
| EPI_ISL_410973             | A/Berlin/14/2020                 |
| EPI_ISL_410978             | A/Berlin/16/2020                 |
| EPI_ISL_410979             | A/Berlin/17/2020                 |

|                |                               |
|----------------|-------------------------------|
| EPI_ISL_410980 | A/Berlin/18/2020              |
| EPI_ISL_410981 | A/Bayern/28/2020              |
| EPI_ISL_410974 | A/Bayern/17/2020              |
| EPI_ISL_410975 | A/Bayern/29/2020              |
| EPI_ISL_410976 | A/Berlin/19/2020              |
| EPI_ISL_410977 | A/Nordrhein-Westfalen/21/2020 |
| EPI_ISL_645142 | A/Berlin/25/2020              |
| EPI_ISL_413431 | A/Berlin/21/2020              |
| EPI_ISL_413432 | A/Berlin/22/2020              |
| EPI_ISL_413433 | A/Berlin/26/2020              |
| EPI_ISL_413434 | A/Berlin/23/2020              |
| EPI_ISL_413435 | A/Niedersachsen/17/2020       |
| EPI_ISL_413436 | A/Bayern/38/2020              |
| EPI_ISL_413437 | A/Rheinland-Pfalz/13/2020     |
| EPI_ISL_413438 | A/Baden-Wuerttemberg/41/2020  |
| EPI_ISL_413439 | A/Hessen/17/2020              |
| EPI_ISL_645143 | A/Bayern/41/2020              |
| EPI_ISL_413442 | A/Berlin/42/2020              |
| EPI_ISL_413444 | A/Baden-Wuerttemberg/110/2020 |
| EPI_ISL_645144 | A/Schleswig-Holstein/2/2020   |
| EPI_ISL_413448 | A/Sachsen/52/2020             |
| EPI_ISL_413449 | A/Sachsen/17/2020             |
| EPI_ISL_482819 | A/Nordrhein-Westfalen/58/2020 |
| EPI_ISL_482821 | A/Bremen/3/2020               |
| EPI_ISL_482822 | A/Nordrhein-Westfalen/30/2020 |
| EPI_ISL_482823 | A/Hessen/16/2020              |
| EPI_ISL_482824 | A/Baden-Wuerttemberg/61/2020  |
| EPI_ISL_482825 | A/Niedersachsen/50/2020       |
| EPI_ISL_482826 | A/Niedersachsen/89/2020       |
| EPI_ISL_482827 | A/Bayern/44/2020              |
| EPI_ISL_482828 | A/Berlin/49/2020              |
| EPI_ISL_482829 | A/Schleswig-Holstein/9/2020   |
| EPI_ISL_482830 | A/Rheinland-Pfalz/25/2020     |
| EPI_ISL_482831 | A/Niedersachsen/51/2020       |
| EPI_ISL_645145 | A/Berlin/51/2020              |
| EPI_ISL_482832 | A/Bayern/31/2020              |
| EPI_ISL_482833 | A/Niedersachsen/53/2020       |
| EPI_ISL_482834 | A/Sachsen/38/2020             |
| EPI_ISL_482836 | A/Baden-Wuerttemberg/122/2020 |
| EPI_ISL_482837 | A/Berlin/50/2020              |
| EPI_ISL_481431 | A/Berlin/37/2020              |
| EPI_ISL_481432 | A/Nordrhein-Westfalen/40/2020 |
| EPI_ISL_645146 | A/Berlin/52/2020              |
| EPI_ISL_481433 | A/Baden-Wuerttemberg/177/2020 |
| EPI_ISL_481434 | A/Berlin/69/2020              |
| EPI_ISL_481435 | A/Baden-Wuerttemberg/178/2020 |
| EPI_ISL_645148 | A/Berlin/53/2020              |
| EPI_ISL_645149 | A/Berlin/54/2020              |
| EPI_ISL_645150 | A/Berlin/55/2020              |
| EPI_ISL_645151 | A/Berlin/56/2020              |
| EPI_ISL_645152 | A/Berlin/57/2020              |
| EPI_ISL_481436 | A/Bayern/33/2020              |
| EPI_ISL_481437 | A/Baden-Wuerttemberg/179/2020 |

|                 |                               |
|-----------------|-------------------------------|
| EPI_ISL_481438  | A/Rheinland-Pfalz/19/2020     |
| EPI_ISL_481439  | A/Thuringen/38/2020           |
| EPI_ISL_645153  | A/Baden-Wuerttemberg/96/2020  |
| EPI_ISL_481440  | A/Bayern/36/2020              |
| EPI_ISL_481441  | A/Sachsen/50/2020             |
| EPI_ISL_481442  | A/Nordrhein-Westfalen/43/2020 |
| EPI_ISL_481443  | A/Hessen/25/2020              |
| EPI_ISL_481444  | A/Baden-Wuerttemberg/180/2020 |
| EPI_ISL_481445  | A/Bayern/58/2020              |
| EPI_ISL_481446  | A/Nordrhein-Westfalen/80/2020 |
| EPI_ISL_481447  | A/Niedersachsen/77/2020       |
| EPI_ISL_481448  | A/Nordrhein-Westfalen/49/2020 |
| EPI_ISL_481449  | A/Thuringen/46/2020           |
| EPI_ISL_645154  | A/Berlin/44/2020              |
| EPI_ISL_481450  | A/Bayern/51/2020              |
| EPI_ISL_481451  | A/Baden-Wuerttemberg/112/2020 |
| EPI_ISL_481452  | A/Niedersachsen/100/2020      |
| EPI_ISL_481453  | A/Nordrhein-Westfalen/57/2020 |
| EPI_ISL_481454  | A/Bayern/40/2020              |
| EPI_ISL_481455  | A/Baden-Wuerttemberg/118/2020 |
| EPI_ISL_481456  | A/Bremen/14/2020              |
| EPI_ISL_645155  | A/Berlin/45/2020              |
| EPI_ISL_481457  | A/Nordrhein-Westfalen/55/2020 |
| EPI_ISL_481458  | A/Thuringen/65/2020           |
| EPI_ISL_481459  | A/Baden-Wuerttemberg/117/2020 |
| EPI_ISL_481460  | A/Niedersachsen/90/2020       |
| EPI_ISL_481461  | A/Hessen/44/2020              |
| EPI_ISL_405012  | A/Brandenburg/30/2019         |
| EPI_ISL_481462  | A/Schleswig-Holstein/10/2020  |
| EPI_ISL_481463  | A/Rheinland-Pfalz/28/2020     |
| EPI_ISL_481464  | A/Hessen/34/2020              |
| EPI_ISL_481465  | A/Nordrhein-Westfalen/72/2020 |
| EPI_ISL_481466  | A/Nordrhein-Westfalen/73/2020 |
| EPI_ISL_481467  | A/Baden-Wuerttemberg/143/2020 |
| EPI_ISL_481468  | A/Berlin/59/2020              |
| EPI_ISL_481469  | A/Niedersachsen/93/2020       |
| EPI_ISL_481470  | A/Rheinland-Pfalz/30/2020     |
| EPI_ISL_481471  | A/Niedersachsen/136/2020      |
| EPI_ISL_481472  | A/Hessen/45/2020              |
| EPI_ISL_481473  | A/Brandenburg/14/2020         |
| EPI_ISL_481474  | A/Berlin/65/2020              |
| EPI_ISL_481475  | A/Hessen/36/2020              |
| EPI_ISL_481476  | A/Baden-Wuerttemberg/145/2020 |
| EPI_ISL_481477  | A/Hessen/46/2020              |
| EPI_ISL_481478  | A/Nordrhein-Westfalen/62/2020 |
| EPI_ISL_481479  | A/Niedersachsen/97/2020       |
| EPI_ISL_481481  | A/Bremen/10/2020              |
| EPI_ISL_481482  | A/Bremen/12/2020              |
| EPI_ISL_645156  | A/Niedersachsen/138/2020      |
| EPI_ISL_645210  | A/Brandenburg/13/2020         |
| EPI_ISL_645157  | A/Sachsen/72/2020             |
| EPI_ISL_645211  | A/Berlin/64/2020              |
| EPI_ISL_9322868 | A/Bremen/1/2021               |

|                  |                                  |
|------------------|----------------------------------|
| EPI_ISL_9250445  | A/Berlin/2/2021                  |
| EPI_ISL_9250458  | A/Berlin/8/2021                  |
| EPI_ISL_9198200  | A/Schleswig-Holstein/1/2021      |
| EPI_ISL_9250472  | A/Berlin/3/2021                  |
| EPI_ISL_9198201  | A/Hessen/1/2021                  |
| EPI_ISL_9250477  | A/Berlin/9/2021                  |
| EPI_ISL_9854355  | A/Berlin/10/2021                 |
| EPI_ISL_9854356  | A/Baden-Wuerttemberg/1/2021      |
| EPI_ISL_9854357  | A/Nordrhein-Westfalen/1/2021     |
| EPI_ISL_9854358  | A/Niedersachsen/2/2021           |
| EPI_ISL_9854359  | A/Berlin/4/2021                  |
| EPI_ISL_9854354  | A/Berlin/11/2021                 |
| EPI_ISL_9854360  | A/Rheinland-Pfalz/2/2021         |
| EPI_ISL_10155209 | A/Berlin/5/2021                  |
| EPI_ISL_10155231 | A/Berlin/12/2021                 |
| EPI_ISL_10155243 | A/Berlin/6/2021                  |
| EPI_ISL_10155255 | A/Thuringen/1/2022               |
| EPI_ISL_10155267 | A/Berlin/7/2021                  |
| EPI_ISL_10155279 | A/Hessen/1/2022                  |
| EPI_ISL_10155292 | A/Baden-Wuerttemberg/2/2021      |
| EPI_ISL_10155304 | A/Thuringen/2/2022               |
| EPI_ISL_10155318 | A/Berlin/1/2022                  |
| EPI_ISL_10155329 | A/Berlin/8/2022                  |
| EPI_ISL_10155330 | A/Berlin/2/2022                  |
| EPI_ISL_10155331 | A/Hessen/2/2022                  |
| EPI_ISL_10155338 | A/Hessen/3/2022                  |
| EPI_ISL_10155350 | A/Berlin/3/2022                  |
| EPI_ISL_10155375 | A/Berlin/6/2022                  |
| EPI_ISL_11217717 | A/Bayern/5/2022                  |
| EPI_ISL_11217718 | A/Bayern/2/2022                  |
| EPI_ISL_11217719 | A/Bayern/6/2022                  |
| EPI_ISL_11217720 | A/Bayern/3/2022                  |
| EPI_ISL_11217721 | A/Nordrhein-Westfalen/1/2022     |
| EPI_ISL_11217723 | A/Baden-Wuerttemberg/1/2022      |
| EPI_ISL_11217724 | A/Sachsen/1/2022                 |
| EPI_ISL_11217726 | A/Berlin/9/2022                  |
| EPI_ISL_11217727 | A/Mecklenburg-Vorpommern/18/2022 |
| EPI_ISL_11217728 | A/Mecklenburg-Vorpommern/4/2022  |
| EPI_ISL_11217729 | A/Bremen/1/2022                  |
| EPI_ISL_11217730 | A/Thuringen/5/2022               |
| EPI_ISL_11217731 | A/Baden-Wuerttemberg/3/2022      |
| EPI_ISL_11217734 | A/Berlin/10/2022                 |
| EPI_ISL_11787002 | A/Mecklenburg-Vorpommern/20/2022 |
| EPI_ISL_11787059 | A/Mecklenburg-Vorpommern/21/2022 |
| EPI_ISL_11787073 | A/Mecklenburg-Vorpommern/22/2022 |
| EPI_ISL_11787087 | A/Mecklenburg-Vorpommern/23/2022 |
| EPI_ISL_11787101 | A/Mecklenburg-Vorpommern/24/2022 |
| EPI_ISL_11787113 | A/Mecklenburg-Vorpommern/25/2022 |
| EPI_ISL_11787147 | A/Hessen/8/2022                  |
| EPI_ISL_11787134 | A/Mecklenburg-Vorpommern/28/2022 |
| EPI_ISL_11787200 | A/Mecklenburg-Vorpommern/8/2022  |
| EPI_ISL_11787161 | A/Mecklenburg-Vorpommern/29/2022 |
| EPI_ISL_11217735 | A/Mecklenburg-Vorpommern/14/2022 |

|                            |                                  |
|----------------------------|----------------------------------|
| EPI_ISL_11217736           | A/Baden-Wuerttemberg/5/2022      |
| EPI_ISL_11217737           | A/Baden-Wuerttemberg/6/2022      |
| EPI_ISL_11217738           | A/Berlin/12/2022                 |
| EPI_ISL_11786836           | A/Mecklenburg-Vorpommern/19/2022 |
| EPI_ISL_11787239           | A/Mecklenburg-Vorpommern/11/2022 |
| EPI_ISL_11787254           | A/Mecklenburg-Vorpommern/13/2022 |
| EPI_ISL_11787268           | A/Thuringen/4/2022               |
| <b>Accession No GISAID</b> | <b>Isolate name influenza B</b>  |
| EPI_ISL_407213             | B/Thuringen/2/2020               |
| EPI_ISL_645163             | B/Thuringen/5/2020               |
| EPI_ISL_481484             | B/Rheinland-Pfalz/3/2020         |
| EPI_ISL_481485             | B/Bremen/1/2020                  |
| EPI_ISL_481486             | B/Nordrhein-Westfalen/5/2020     |
| EPI_ISL_481487             | B/Berlin/11/2020                 |
| EPI_ISL_481488             | B/Bayern/4/2020                  |
| EPI_ISL_481489             | B/Saarland/1/2020                |
| EPI_ISL_481491             | B/Baden-Wuerttemberg/53/2020     |
| EPI_ISL_481492             | B/Nordrhein-Westfalen/7/2020     |
| EPI_ISL_481494             | B/Berlin/14/2020                 |
| EPI_ISL_481495             | B/Berlin/24/2020                 |
| EPI_ISL_645161             | B/Berlin/15/2020                 |
| EPI_ISL_481496             | B/Berlin/16/2020                 |
| EPI_ISL_481497             | B/Mecklenburg-Vorpommern/1/2020  |
| EPI_ISL_481498             | B/Bayern/7/2020                  |
| EPI_ISL_481499             | B/Baden-Wuerttemberg/35/2020     |
| EPI_ISL_481500             | B/Bayern/11/2020                 |
| EPI_ISL_481501             | B/Hessen/4/2020                  |
| EPI_ISL_481502             | B/Baden-Wuerttemberg/51/2020     |
| EPI_ISL_481503             | B/Baden-Wuerttemberg/37/2020     |
| EPI_ISL_481504             | B/Baden-Wuerttemberg/38/2020     |
| EPI_ISL_481505             | B/Nordrhein-Westfalen/9/2020     |
| EPI_ISL_481506             | B/Mecklenburg-Vorpommern/2/2020  |
| EPI_ISL_481507             | B/Bremen/2/2020                  |
| EPI_ISL_481508             | B/Baden-Wuerttemberg/39/2020     |
| EPI_ISL_481509             | B/Rheinland-Pfalz/5/2020         |
| EPI_ISL_645162             | B/Berlin/21/2020                 |
| EPI_ISL_645167             | B/Baden-Wuerttemberg/40/2020     |
| EPI_ISL_645168             | B/Berlin/23/2020                 |
| EPI_ISL_10429834           | B/Berlin/1/2021                  |
| EPI_ISL_406722             | B/Thuringen/2/2020               |
